## Original Article

# The impact of malnutrition in morbidity and mortality in stable haemodialysis patients

Roberto Marcén<sup>1</sup>, Jose Luis Teruel<sup>1</sup>, Miguel Angel de la Cal<sup>2</sup>, Carmen Gámez<sup>1</sup> and the Spanish Cooperative Study of Nutrition in Hemodialysis

<sup>1</sup>Department of Nephrology, Hospital Ramon y Cajal, Madrid, and <sup>2</sup>Intensive Care Unit, Hospital Universitario de Getafe, Madrid, Spain

### Abstract

**Background.** When assessed by single biochemical measurements, malnutrition in dialysis patients is associated with increased mortality, but there are few data evaluating abnormalities in anthropometry or composite nutritional scores and outcome. The aim of our study was to ascertain the prevalence and severity of malnutrition in 761 stable patients from 20 haemodialysis centres and its influence in morbidity and mortality after one year of follow-up.

**Methods.** Malnutrition was estimated by scoring four anthropometric indexes; body mass index (BMI), triceps skinfold thickness (TSF), mid-arm circumference (MAC), and mid-arm muscle circumference (MAMC); three biochemical measurements; serum albumin, serum transferrin and total lymphocyte count; and clinical examination. Mortality and hospitalizations were collected prospectively during the year of follow-up.

**Results.** A moderate/severe degree of malnutrition was presented by 51.6% of male and 46.3% of female patients. TSF was moderate–severely decreased in 41% without differences between males and females. MAMC was moderately decreased in 19.8% of males and in 8.1% of females ( $P < 0.001$ ). Multiple logistic regression analysis showed that the predictors of malnutrition were: age  $> 65$  years (OR = 1.96, CI: 1.22–3.14), male sex (OR = 1.95, CI: 1.24–3.07), comorbidity index (OR = 1.23, CI: 1.03–1.45), time on dialysis (OR = 1.13, CI: 1.08–1.18), duration of dialysis (OR = 0.73, CI: 0.63–0.85) and PCR related to ideal body weight (OR = 0.17, CI: 0.06–0.50).

After 1 year of follow-up, data from 442 patients were available. A total of 68 patients died (15.4%) with cardiovascular diseases being the most frequent cause of death (57.3% of the cases). The predictors of mortality were: age (OR = 1.06, CI: 1.03–1.09), cardiovascular disease (OR = 2.13, CI: 1.19–3.83), neurological disease (OR = 2.96, CI: 1.41–6.15),

nephroangiosclerosis (OR = 2.34, CI: 1.10–4.98) and total lymphocyte count (OR = 0.93, CI: 0.87–0.98). Hospitalization was needed in 44% of patients. The comorbidity index, serum albumin and age were the predictive factors of hospitalization.

**Conclusions.** Protein–calorie malnutrition is frequent in haemodialysis patients. Fat depletion predominated in both sexes. Duration of dialysis and protein catabolic rate related to ideal body weight was the only predictor which could be influenced by a nutritional intervention. Morbidity appeared to be influenced by the comorbidity index and age was the strongest predictor of mortality. The only nutritional measurements predictive of morbidity and mortality were serum albumin and total lymphocyte count respectively. Therefore, the influence of malnutrition in morbidity and mortality can not be definitively stated.

**Key words:** haemodialysis; hospitalization rate; malnutrition; mortality; protein catabolic rate

### Introduction

For over 20 years, protein–calorie malnutrition has been reported as a frequent complication in patients on maintenance haemodialysis therapy and it has been attributed to several causes, including inadequate intake of protein and energy, inhibition of protein synthesis and/or stimulation of protein degradation [1–5]. Its prevalence has varied from 25–75% among the series published [6–16]. These differences could be partially explained by the methods used in the assessment of the nutritional status; anthropometric measurements, biochemical determinations or a combination of both. Despite the high prevalence of malnutrition in patients on haemodialysis, no multivariate analysis investigating the factors which predict the development of abnormal anthropometry is available.

The importance of malnutrition is due to the fact that suboptimal nutritional status in haemodialysis

Correspondence and offprint requests to: Roberto Marcén, MD, Department of Nephrology, Hospital Ramon y Cajal, Ctra Colmenar Viejo Km 9.1, 28034 Madrid, Spain.

patients has been associated with an increased morbidity and mortality [11,17–25]. However, in the majority of these studies the evaluation of malnutrition was mainly based on the measurements of serum albumin and other serum proteins and there are a few but no definitive studies where malnutrition mostly evaluated by anthropometric parameters, was associated with increased mortality [12,13]. Furthermore, the possible effects of malnutrition cannot be easily separated from the effects of the underlying disease. Patients on chronic haemodialysis have additional complicating conditions such as cardiovascular, gastrointestinal and liver diseases. These complications can produce anorexia and malnutrition and this could be a marker of illness rather than the cause of death [3].

Among the biochemical parameters, hypoalbuminaemia has been considered to be the single most important predictor of death [20–25]. Low values of serum albumin have been attributed to poor nutritional status, but recently hypoalbuminaemia has been considered to be a non-specific marker of inflammation [26,27]. As in other situations, and in the enthusiasm to promote the importance of nutrition, other significant and perhaps more fundamental factors that predispose haemodialysis patients to death may have been overlooked.

We conducted a multicentre study in our country to try to answer some of these issues. In this study, we have evaluated the prevalence of malnutrition in a group of stable patients on maintenance haemodialysis therapy and the possible risk factors involved in its development. In addition, the role of malnutrition in morbidity and mortality in the haemodialysis patients was investigated. Malnutrition was assessed by a combination of anthropometric and biochemical measurements.

## Patients and methods

### Patients

A total of 761 patients on haemodialysis from 20 facilities in the central region of Spain (Madrid and surrounding provinces) received a full nutritional evaluation between January and March 1993 and were followed-up for 1 year. Informed consent was obtained in every case. The criteria for inclusion in the study were: (i) at least 6 months on haemodialysis; (ii) clinically with no acute illness in the 3 months preceding the start of the study; (iii) diuresis <1000 ml/day. Patients who did not fulfil any of these conditions were excluded from the study.

Complete data were obtained from 574 patients; there were 318 male and 256 female patients, and the mean age was  $56.4 \pm 14.6$  years (range 18–81 years). The length of time on dialysis was  $76 \pm 59$  months (range 6–286 months). All patients were on thrice weekly haemodialysis. The duration of the dialysis procedure ranged from 9 to 15 h per week. The blood flow was between 250 and 350 ml/min and the dialysate flow was 500 ml/min. In all 84% of the patients were on bicarbonate and 16% on acetate; 49% were on antihypertensive therapy and 67.4% receiving recombinant human erythropoietin. Underlying renal diseases were:

chronic glomerulonephritis (24.2%), interstitial nephritis (18.8%), nephroangiosclerosis (12.5%), adult polycystic disease (9.3%), diabetes (8.6%), others (10.1%) and unknown (6.5%).

### Methods

At the start of the study, significant comorbid medical problems which could influence the nutritional status or the outcome were inventoried. They included: cardiovascular disease (angina pectoris, congestive heart failure, myocardial infarction and peripheral vascular diseases), musculoskeletal disease (hyperparathyroidism, aluminium poisoning), neurological disease (stroke, transient ischaemic attacks, seizures, dementia), liver disease (chronic hepatitis and cirrhosis), hypertension (patients on antihypertensive therapy), primary renal disease (diabetes, nephroangiosclerosis) and social conditions. Each comorbid medical problem was assigned 0 points when the condition was not present and 1 point when it was. The points were totalled for each patient to obtain a comorbidity index.

Anthropometric measurements were performed using standard techniques [6,28–30] and included: height, weight, body mass index (BMI), i.e. weight divided by height squared, triceps skinfold thickness (TSF), mid-arm circumference (MAC), mid-arm muscle circumference (MAMC). The non-dominant arm was chosen for these measurements, unless that arm contained a vascular access site, in which case the other arm was used. Skinfold thickness was measured by a Harpenden skin caliper. The measurements were performed in each unit by the same trained person after the midweek haemodialysis session, who followed precise written instructions. To assess the reproductivity of anthropometric measurements, four different observers performed the measurements on 30 patients in 2 consecutive weeks. The inter- and intra-observer coefficients of variation for TSF were <10% in both cases. The BMI, TSF, MAC and MAMC of the patients were compared with data obtained from normal Spanish adults of similar age and sex [31,32]. There were some differences from those of the American population [33]; TSF values were 25–35% lower in the Spanish population than in the American population, MAC values were only 5–10% lower in the Spanish population and MAMC values were 4.9% lower in Spanish men but similar in women. Normal parameters were defined when they were >90% of the 50th percentile of the controls. Mild decreases were defined by parameters of 80–90% of the 50th percentile of the controls. Moderate decreases were defined by a BMI of 70–79%, as well as TSF, MAC and MAMC of 60–79%. Severe decreases were defined by the BMI <70%, and TSF, MAC and MAMC <60% of the 50th percentile.

Routine biochemical parameters were measured in blood drawn immediately before the first treatment of the week from the arteriovenous access and the following determinations were performed: haematocrit, haemoglobin, total lymphocyte count, blood urea nitrogen (BUN), serum creatinine, electrolytes, total protein, serum albumin, transferrin, pre-albumin. Plasma amino acids were measured in only 200 randomly selected patients. Measurements, except for plasma amino acids, were performed in the laboratory at each patient's centre on plasma or serum. Serum albumin was determined by a bromocresol method (normal range 3.4–5 g/dl).

A scoring system described by Bilbrey and Cohen [13] was used to quantify the degree of malnutrition. Eight parameters from the anthropometric (BMI, TSF, MAC, MAMC), labor-

atory (serum albumin, serum transferrin and lymphocytes) and clinical examination were used and each of them was given a score of 3 if normal and 4, 5, 6 if mildly, moderately or severely decreased respectively. The score ranged from a minimum of 24 to a maximum of 48. Four categories were defined according to the score: normal ( $\leq 25$ ), mild malnutrition (26–28), moderate malnutrition (29–33) and severe malnutrition ( $\geq 32$ ).

The dialysis dose was evaluated by the following parameters: hours of dialysis per week, midweek BUN, Kt/V and protein catabolic rate (PCR). Kt/V was calculated as the natural logarithm of BUN 1/BUN 2 and the effects of ultrafiltration were not considered. PCR was calculated as described [34,35].

$$\text{PCR (g/day)} = 9.35 G + 0.294 V \quad (1)$$

$$G \text{ (mg/min)} = [\text{BUN 3} - \text{BUN 2}] V \text{ (dl)}/T \text{ (min)}$$

V (total body water) was calculated by the equations proposed by Watson *et al.* [36].

\*Male:  $V \text{ (l)} = 2.447 - 0.09516 A \text{ (year)} + 0.01074 \text{ height (cm)} + 0.3362 \text{ weight (kg)}$ .

\*Female:  $V \text{ (l)} = -2.097 + 0.1069 \text{ height (cm)} + 0.2466 \text{ weight (kg)}$ .

Normalized PCR [PCRn] to lean body mass to actual body weight, and to ideal body weight [PCRibw] were also calculated.

### Statistical analysis

Values were expressed as mean  $\pm$  SD. Each parameter represented the mean of two or three measurements performed in consecutive months. The  $\chi^2$  test was used to compare categorical data, and the Student's and the Mann-Whitney tests were performed when indicated. Multiple logistic regression models were used to determine the adjusted effect of the binary independent variables on nutritional status, mortality and morbidity [37,38]. In each case, the variables included in the model were those that have the most significant relationship to the dependent outcome in the univariate analysis ( $P$  value for the variable to be included should be no greater than 0.1). For malnutrition (yes=1, no=0), the variables included in the maximum model were age, gender, time on dialysis, comorbidity index, serum creatinine, hours of dialysis and PCRibw. For mortality (yes=1, no=0), the variables in the maximum model were age, comorbidity (cardiovascular, neurological, nephroangiosclerosis), MAMC, total lymphocyte count, serum albumin, serum creatinine and the nutritional index. For hospitalization (yes=1, no=0), the variables included in the maximum model were age, gender, the comorbidity index, serum albumin, serum creatinine and the nutritional index. Backward stepwise elimination was used to reduce the models to the subgroups of factors that made statistically significant contribution to nutritional status, mortality and morbidity (regression coefficient,  $P < 0.05$ ).

## Results

### Prevalence of malnutrition

The anthropometric characteristics of the patients are shown in Table 1. The majority of stable patients on dialysis presented some alteration in the anthropometric measurements when compared with the control population. TSF was the most frequently altered para-

**Table 1.** Anthropometric measurements. Values are mean  $\pm$  SD

|                          | Male<br>(n=318) | Female<br>(n=256) | P      |
|--------------------------|-----------------|-------------------|--------|
| Age (years)              | 56.4 $\pm$ 14.6 | 56.2 $\pm$ 14.5   | 0.847  |
| Weight (kg)              | 63.5 $\pm$ 9.4  | 58.6 $\pm$ 11.5   | <0.001 |
| Height (cm)              | 164.7 $\pm$ 7.7 | 153.2 $\pm$ 7.6   | <0.001 |
| BMI (kg/m <sup>2</sup> ) | 23.4 $\pm$ 3.2  | 24.9 $\pm$ 4.8    | <0.001 |
| TSF (mm)                 | 11.0 $\pm$ 6.5  | 17.5 $\pm$ 8.4    | <0.001 |
| MAC (cm)                 | 26.1 $\pm$ 2.8  | 27.1 $\pm$ 4.3    | <0.01  |
| MAMC (cm)                | 22.5 $\pm$ 2.6  | 21.6 $\pm$ 3.8    | <0.001 |

Abbreviations: BMI, body mass index; TSF, triceps skinfold thickness; MAC, mid-arm circumference; MAMC, mid-arm muscle circumference.

meter in both sexes: 41.2% men and 41.4% women had moderate or severe reductions (<80% of the standard 50th percentile), but moderate/severe reductions in MAMC (<80% of the standard 50th percentile) predominated in men (19.8% compared with 8.2%,  $P < 0.001$ ) indicating a more severe depletion of proteins (Table 2). The majority of patients (440 patients or 76.6%) had serum albumin levels  $> 40$  g/l, 117 patients (20.4%) had levels of 35–40 g/l and only 17 patients (3%) had serum albumin levels  $< 35$  g/l. Transferrin was decreased in 34.5% of patients ( $< 2$  g/l). Total lymphocyte count was  $< 1500 \times 10^6/l$  in 57.3% of the patients and  $< 1200 \times 10^6/l$  in 32.9%. According to the malnutrition index, 80% of patients had some degree of malnutrition; it was mild in 30%, moderate in 22%, severe in 28% and there was no evidence of malnutrition in 20%. The prevalence of moderate/severe malnutrition (malnutrition index  $> 28$ ) in both sexes was 52.8% in males and 47.9% in females.

Data from patients without malnutrition (malnutrition index  $< 28$ ) and with moderate–severe malnutrition (malnutrition index  $> 28$ ) are shown in Table 3. Among the biochemical measurements not included in the nutritional index, no differences were found in the levels of total proteins, and branched chain amino

**Table 2.** Prevalence of alterations in anthropometric measurements. Figures in parentheses are percentages

|        | Normal      | Mild        | Moderate   | Severe     |
|--------|-------------|-------------|------------|------------|
| BMI    |             |             |            |            |
| male   | 150 (47.2%) | 105 (33.0%) | 56 (17.6%) | 7 (2.2%)   |
| female | 158 (61.7%) | 68 (26.6%)  | 25 (9.8%)  | 5 (1.9%)   |
| TSF    |             |             |            |            |
| male   | 152 (47.8%) | 35 (11.0%)  | 66 (20.8%) | 65 (20.4%) |
| female | 120 (46.9%) | 30 (11.7%)  | 44 (17.2%) | 62 (24.2%) |
| MAC    |             |             |            |            |
| male   | 162 (50.9%) | 93 (29.2%)  | 63 (19.8%) | 0 (0.0%)   |
| female | 158 (61.7%) | 63 (24.6%)  | 34 (13.3%) | 1 (0.4%)   |
| MAMC   |             |             |            |            |
| male   | 132 (41.5%) | 123 (38.7%) | 60 (18.9%) | 3 (0.9%)   |
| female | 176 (68.8%) | 59 (23.0%)  | 19 (7.4%)  | 2 (0.8%)   |

Abbreviations: BMI, body mass index; TST, triceps skinfold thickness; MAC, mid-arm circumference; MAMC, mid-arm muscle circumference.

**Table 3.** Characteristics and nutritional status of patients\*. Values are mean  $\pm$  SD

|                                               | Normal<br>(n=296) | Malnutrition<br>(n=278) | P      |
|-----------------------------------------------|-------------------|-------------------------|--------|
| Sex (m/f)                                     | 154/142           | 164/114                 | 0.128  |
| Age (yr)                                      | 55.6 $\pm$ 14.6   | 57.1 $\pm$ 14.7         | 0.176  |
| Time on HD(months)                            | 65.8 $\pm$ 52.3   | 86.8 $\pm$ 63.6         | <0.001 |
| Comorbidity index                             | 1.4 $\pm$ 1.1     | 1.8 $\pm$ 1.4           | <0.001 |
| EPO treatment (No/Yes)                        | 95/201            | 92/186                  | 0.745  |
| Hct (%)                                       | 32.1 $\pm$ 4.7    | 31.6 $\pm$ 5.0          | 0.319  |
| BUN (mmol/l)                                  | 28.6 $\pm$ 6.0    | 28.2 $\pm$ 6.0          | 0.433  |
| SCr (umol/l)                                  | 1109 $\pm$ 230    | 937 $\pm$ 221           | 0.001  |
| Total proteins (g/l)                          | 69.7 $\pm$ 5.6    | 69.9 $\pm$ 5.5          | 0.630  |
| Serum albumin (g/l)                           | 42.1 $\pm$ 4.0    | 41.3 $\pm$ 4.1          | 0.111  |
| Serum transferrin (g/l)                       | 2.3 $\pm$ 0.6     | 2.2 $\pm$ 0.5           | <0.01  |
| Total lymphocyte count<br>( $\times 10^6/l$ ) | 1606 $\pm$ 597    | 1378 $\pm$ 542          | <0.01  |
| Plasma valine (umol/l)                        | 188 $\pm$ 56      | 185 $\pm$ 50            | 0.298  |
| Plasma isoleucine (umol/l)                    | 63 $\pm$ 22       | 59 $\pm$ 17             | 0.130  |
| Plasma leucine (umol/l)                       | 108 $\pm$ 40      | 113 $\pm$ 52            | 0.291  |
| Duration of HD (h/week)                       | 10.2 $\pm$ 1.6    | 9.9 $\pm$ 1.4           | <0.05  |
| Kt/V                                          | 1.08 $\pm$ 0.20   | 1.10 $\pm$ 0.21         | 0.103  |
| PCRibw (g/kg/day)                             | 1.02 $\pm$ 0.22   | 0.94 $\pm$ 0.18         | <0.001 |
| Malnutrition index                            | 26.0 $\pm$ 1.4    | 32.5 $\pm$ 2.9          | <0.001 |

\*Patients with moderate or severe malnutrition according to the malnutrition index (>28) had several differences from those with higher values of the index. Plasma amino acid determinations were performed in 90 patients with normal nutritional status and in 82 patients with malnutrition.

Abbreviations: HD, haemodialysis; EPO, erythropoietin; Hct, haematocrit; BUN, blood urea nitrogen; SCr, serum creatinine; PCRibw, protein catabolic rate normalized to ideal body weight.

acids: valine, isoleucine and leucine. Moreover, no differences were observed in some parameters evaluating the amount of dialysis (midweek BUN, KT/V and PCR normalized to lean and actual body weight) and the nutritional status. However, the length of weekly haemodialysis and PCR normalized to ideal body weight were lower in the group of patients with malnutrition. Some biochemical parameters such as serum creatinine ( $r = -0.190$ ,  $P < 0.001$ ), and PCRibw ( $r = -0.183$ ,  $P < 0.001$ ), showed a low, negative, but significant correlation with the malnutrition index. Furthermore, serum albumin was positively correlated with serum creatinine concentration ( $r = 0.325$ ,  $P < 0.001$ ) and negatively with the comorbidity index ( $r = -0.168$ ,  $P < 0.001$ ).

The multiple logistic regression analysis showed that six independent variables influenced the nutritional status: age, gender, time on dialysis, comorbidity index, hours of dialysis and PCR normalized to ideal body weight (Table 4). Gender increased the significance when the model was adjusted by hours of dialysis and PCRibw. Hours of dialysis and PCRibw were powerful predictors of risk. When compared with a reference PCR of 1.2 g/kg/day, patients with lower PCR values had progressively increased odds ratios for malnutrition (Figure 1).

#### Evolution after 1 year follow-up

After 1 year of follow-up, complete information on 84 patients was not available and 48 patients had received

**Table 4.** Results of the multiple logistic regression analysis to identify predictors of malnutrition

|                    | Odds ratio | 95% Confidence interval | P      |
|--------------------|------------|-------------------------|--------|
| Age (>65 years=1)  | 1.96       | 1.22–3.14               | 0.005  |
| Sex (male=1)       | 1.95       | 1.24–3.07               | 0.004  |
| Comorbidity index  | 1.23       | 1.03–1.45               | 0.017  |
| Time on HD (years) | 1.13       | 1.08–1.18               | <0.001 |
| Duration of HD (h) | 0.73       | 0.63–0.85               | <0.001 |
| PCRibw (g/kg/day)  | 0.17       | 0.06–0.50               | <0.001 |

Abbreviations: HD, haemodialysis; PCRibw, protein catabolic rate normalized to ideal body weight.

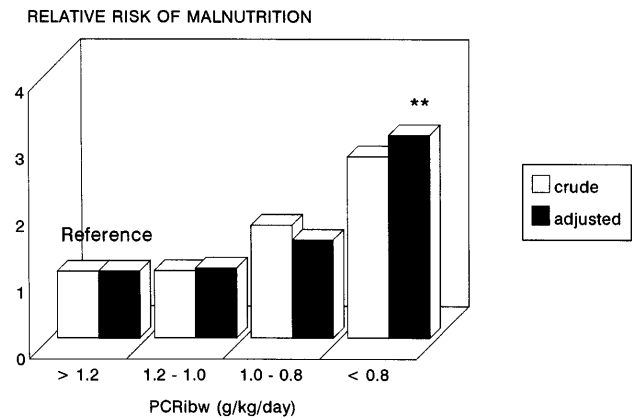

**Fig. 1.** Comparison of crude and adjusted relative risk of malnutrition for groups of patients with different protein intake measured by the protein catabolic rate normalized to ideal body weight (PCRibw). \*\* $P < 0.01$  compared with reference.

a transplant. The analysis of morbidity and mortality was conducted using data from the remaining 442 patients. Of the patients, 68 (15.4%) had died during the year of follow-up. The characteristics of the patients according to the outcome are expressed in Table 5. Age and the comorbidity index were higher in the dead patients who had a greater frequency of diabetes and nephroangiosclerosis. MAMC was lower in the dead patients than in those patients alive after 1 year of follow-up. Among the biochemical measurements, only lymphocytes, serum creatinine and serum albumin showed differences between the dead and live patients.

Cardiovascular disorders accounted for 57.3% of total deaths, followed by infection (10.4%), malignancies (5.9%) and other causes (20.6%). Only four patients (5.9%) died of cachexia. Multiple logistic regression analysis was performed to investigate the predictors of death, and the results are summarized in Table 6. Age, cardiovascular disease, neurological diseases, nephroangiosclerosis and total lymphocyte count were found to be the only significant predictors of death. Anthropometric and biochemical parameters were not significant predictors of death.

Morbidity was evaluated by the hospitalization rates. There were 309 hospitalizations and 195 patients (44.1%) needed hospitalization during the year of

**Table 5.** Characteristics associated with mortality. Values are mean  $\pm$  SD. Values of diabetes and hypertension are those with/those without

|                                               | Survived<br>( <i>n</i> = 374) | Died<br>( <i>n</i> = 68) | <i>P</i> |
|-----------------------------------------------|-------------------------------|--------------------------|----------|
| Age (years)                                   | 56.4 $\pm$ 14.0               | 65.8 $\pm$ 10.9          | <0.001   |
| Sex (m/f)                                     | 204/170                       | 39/29                    | 0.725    |
| Time on HD (months)                           | 80.5 $\pm$ 61.5               | 76.1 $\pm$ 59.8          | 0.576    |
| Comorbidity index                             | 1.6 $\pm$ 1.3                 | 2.3 $\pm$ 1.4            | <0.001   |
| Nephroangiosclerosis (no/yes)                 | 336/38                        | 51/17                    | <0.01    |
| Diabetes (no/yes)                             | 345/29                        | 56/12                    | <0.05    |
| Hypertension (no/yes)                         | 180/194                       | 39/29                    | 0.186    |
| BMI (kg/m <sup>2</sup> )                      | 24.3 $\pm$ 4.0                | 24.5 $\pm$ 4.5           | 0.758    |
| TST (mm)                                      | 13.7 $\pm$ 8.1                | 14.3 $\pm$ 8.1           | 0.562    |
| MAC (cm)                                      | 26.7 $\pm$ 3.6                | 25.9 $\pm$ 3.9           | 0.144    |
| MAMC (cm)                                     | 22.3 $\pm$ 3.4                | 21.5 $\pm$ 3.0           | 0.041    |
| SCr ( $\mu$ mol/l)                            | 1008 $\pm$ 247                | 989 $\pm$ 241            | <0.001   |
| Serum albumin (g/l)                           | 42 $\pm$ 3.9                  | 40 $\pm$ 5.0             | 0.033    |
| Total lymphocyte count<br>( $\times 10^6/l$ ) | 1584 $\pm$ 594                | 1261 $\pm$ 530           | <0.01    |
| Malnutrition index                            | 29.1 $\pm$ 3.9                | 30.7 $\pm$ 4.5           | <0.01    |

Abbreviations: BMI, body mass index; TSF, triceps skinfold thickness; MAC, mid-arm circumference; MAMC, mid-arm muscle circumference; SCr, serum creatinine.

**Table 6.** Results of the multiple logistic regression analysis to identify predictors of death

|                                                        | Odds ratio | 95% Confidence interval | <i>P</i> |
|--------------------------------------------------------|------------|-------------------------|----------|
| Age (years)                                            | 1.06       | 1.03–1.09               | <0.001   |
| Cardiovascular disease (Yes=1)                         | 2.13       | 1.19–3.83               | 0.011    |
| Neurological disease (Yes=1)                           | 2.96       | 1.41–6.16               | 0.003    |
| Nephroangiosclerosis (Yes=1)                           | 2.34       | 1.10–4.98               | 0.027    |
| Total lymphocyte count<br>(100 cells/mm <sup>3</sup> ) | 0.93       | 0.87–0.98               | 0.016    |

follow-up. The admission rates were computed as the total number of hospital admissions divided by the total number of patients years at risk. Hospital days per patient year were computed as the total number of hospital days divided by the number of patient years at risk. The overall rates of hospital admissions and hospital days per patient year at risk are presented in Table 7. Females had higher hospital days per patient year at risk than males. Hospital admission rates and hospital days per patient year at risk increased with age, with comorbidity with hypoalbuminaemia and with malnutrition.

Logistic regression analysis showed three predictors of hospitalization; the comorbidity index [odds ratio 1.37, 95% confidence interval (CI) 1.16–1.60,  $P$  < 0.001], serum albumin (odds ratio 0.51, 95% CI 0.31–0.84,  $P$  < 0.01) and age (odds ratio 1.015, 95% CI 1.001–1.03,  $P$  < 0.05).

## Discussion

The prevalence of moderate/severe malnutrition in our patients was 48%, which is fairly high despite the

**Table 7.** Factors associated with hospitalization

|                                 | Admission rates<br>per patient year<br>at risk | Hospital days<br>per patient year<br>at risk |
|---------------------------------|------------------------------------------------|----------------------------------------------|
| All patients ( <i>n</i> = 442)  | 0.83                                           | 6.45                                         |
| Sex                             |                                                |                                              |
| Male ( <i>n</i> = 242)          | 0.85                                           | 5.87                                         |
| Female ( <i>n</i> = 200)        | 0.86                                           | 9.97                                         |
| Age (years)                     |                                                |                                              |
| < 65 ( <i>n</i> = 293)          | 0.69                                           | 7.26                                         |
| $\geq$ 65 ( <i>n</i> = 149)     | 0.87                                           | 8.65                                         |
| Comorbidity index               |                                                |                                              |
| 0 ( <i>n</i> = 67)              | 0.58                                           | 6.55                                         |
| 1–3 ( <i>n</i> = 338)           | 0.89                                           | 8.81                                         |
| > 3 ( <i>n</i> = 37)            | 1.54                                           | 17.03                                        |
| Malnutrition                    |                                                |                                              |
| No ( <i>n</i> = 90)             | 0.47                                           | 6.55                                         |
| Mild ( <i>n</i> = 133)          | 0.77                                           | 7.11                                         |
| Moderate ( <i>n</i> = 85)       | 0.67                                           | 6.74                                         |
| Severe ( <i>n</i> = 134)        | 1.13                                           | 11.64                                        |
| Serum albumin                   |                                                |                                              |
| $\geq$ 40 g/l ( <i>n</i> = 329) | 0.63                                           | 6.76                                         |
| < 40 g/l ( <i>n</i> = 113)      | 1.12                                           | 10.51                                        |

patients being in a stable clinical condition. However, a similar frequency of alterations on anthropometric and biochemical measurements and nutritional status have been reported [7,9,13,39]. Fat depletion, estimated by decreases of TSF, was the predominant type of malnutrition in both sexes [7,9,10]. These findings differ from those of Bilbrey *et al.* [13] who found a better preservation of triceps skinfold thickness in men, using the same malnutrition criteria. Moderate protein depletion estimated by decreases of MAMC was also present in 20% of the male patients. It has been demonstrated that patients on haemodialysis have a similar energy expenditure and requirements as normal individuals [40,41]. However, dialysis patients usually eat lower amounts of calories than recommended, although the intake of proteins is closer to prescribed levels [7–10]; this could contribute to fat depletion. The differences in the prevalence of malnutrition in the different studies could be due to the method used in the assessment of malnutrition. Assessing nutritional status is difficult as there is not a single test that can be considered an indicator of protein-calorie malnutrition. It has been suggested that an assessment of malnutrition should rely on multiple indices of nutritional status, these indices comprising several biochemical measures, including serum albumin, as well as an analysis of body composition [42]; however, no definitive criteria have been established. Among the indices commonly used, serum proteins such as albumin and transferrin, may be depressed by non-nutritional factors even in haemodialysis patients [26,27,43]. The main criticism of anthropometric measurement is a lack of precision for an individual patient [28,43]. However, Nelson *et al.* [30] have shown that anthropometry can be reproducible and that its sensitivity has a 90% threshold. In our study, the inter- and intra-observer coefficients of variation for TSF were  $\sim$ 10%

and the variance studies did not show differences among the measurements performed by four observers in the same individuals.

We have not been able to find a published report that includes an analysis investigating factors associated with the development of malnutrition. In our study, male sex, time on dialysis, weekly duration of dialysis and PCRibw were the most important predictors of malnutrition. PCRibw values of  $<1.0$  g/kg/day increased the risk of malnutrition by 1.47, and when the PCRibw was  $<0.8$  g/kg/day, the risk of malnutrition was three-fold the reference value after adjusting for other variables. PCR normalized to lean body mass [PCRn] and PCR related to actual body weight did not predict malnutrition, probably because these parameters may overestimate the protein intake of malnourished patients and underestimate the protein intake of obese patients or of those without malnutrition [44]. Our findings may mean that PCRibw is also an indirect estimate of calorie intake. Importantly, duration of dialysis and PCRibw are the only predictors of malnutrition which could be modified by nutritional intervention.

Life expectancy in patients undergoing haemodialysis is markedly reduced [45]. Demographic factors such as age, race and cause of end stage renal disease, comorbid conditions at the start of treatment and several biochemical parameters such as serum albumin, serum creatinine and serum cholesterol have been identified as predictors of mortality in these patients [18–25,46–58]. The predictors of death in our patients were: age, comorbidity (cardiovascular and neurological diseases), nephroangiosclerosis as the cause of primary renal disease and total lymphocyte count. Age was the most important predictor as has been reported in the vast majority of previous studies [18,20–23,47–52,54–58]. However, in this cross-sectional study of Spanish patients, unlike those in North America, anthropometric parameters [13,51] and biochemical measurements [20–25,52,58] were not identified as predictors of death and most of them were not included in the logistic regression model. The only nutritional parameter predictive of mortality was total lymphocyte count. But as with other measurements, several factors related to patient status and the haematological situation can affect results and no definitive data allow a lowered total lymphocyte count to be attributed to protein-calorie malnutrition [29].

Serum albumin was not a predictor of mortality in our patients, as in other studies [57,58,59]. The discrepancy with results from North American dialysis patients [20–25] could be explained by the differences in the patients, the length of the follow-up and the small number of patients with hypoalbuminaemia. The serum albumin concentration was normal in the majority of our patients as in the National Cooperative Dialysis Study population [9] and in recently published series from Italy [57,60,61]. Several studies have described serum albumin levels  $<4$  g/dl in 66% of patients on haemodialysis [20] and  $<3.5$  mg/dl in 14–50% [7,20,24,25,52]. In these series serum albumin

was determined by the bromocresol green, the method used in our study, so the differences we describe can not be due to the method of measuring serum albumin [62]. Regarding differences in patients, we studied stable patients, with  $>6$  months in haemodialysis to identify the impact of nutritional factors rather than acute illness. For example, death rates of 12% can occur during the first 90 days of haemodialysis therapy and such patients have lower values of serum albumin than those who survive [63]. However, the significance of hypoalbuminaemia in such patients is not clear: it has been attributed to insufficient protein intake [64], or an acute response from a disease process [65], or to increased vascular permeability [66,67], or inflammatory state [68]. Kaysen *et al.* [26] found that hypoalbuminaemia in haemodialysis patients is due to decreased albumin synthesis associated with non-nutritional factors.

Cardiovascular diseases were the leading cause of death and infection was the second most important cause of death in our series as in other series [18,25,54,56,69]. Only four patients died of cachexia; these patients were older, had several comorbid factors, and cachexia was considered as a final event. Hospital admission rates and hospital days per patient year at risk were lower than those reported in other series [52,70–73]. The reason for this difference is unknown but it is likely to be due in part to exclusion of patients in the first months of dialysis therapy. Age, the comorbidity index and serum albumin were the only predictors of hospitalization [17], as in mortality no other nutritional measurement was identified as an increasing risk factor.

In summary, malnutrition, estimated by anthropometric and biochemical measurements was a frequent complication in Spanish haemodialysis patients. Fat depletion predominated in both sexes, but protein depletion was present in 20% of males. Age  $>65$  years, time on dialysis, comorbidity, weekly duration of dialysis and PCRibw were the predictors of malnutrition. The mortality rate was 15.4% in this selected group of patients; age at the time of study, comorbid conditions related to vascular diseases and total lymphocyte count were the predictors of death, and cardiovascular diseases were the most important causes. Hospitalization needed in 44% of patients was related to comorbidity, serum albumin and age. Although total lymphocyte count was a predictor of mortality and serum albumin of hospitalization, the fact that malnutrition is a risk factor to mortality and morbidity is not clearly established.

The Spanish Cooperative Study Group of Nutrition in Hemodialysis includes the following Centers and investigators (in alphabetical order): Fundación Jimenez Díaz (Madrid), J. Caramelo; Hospital Clínico de San Carlos (Madrid), J. A. Herrero; Hospital Doce de Octubre (Madrid), E. Hernandez; Hospital General de Guadalajara, G. de Arribas and M. D. Jarillo; Hospital General de Segovia, C. Montoyo and K. L. Revuelta; Hospital Gregorio Marañón (Madrid), R. Perez; Hospital La Paz (Madrid), J. Martinez and

J. L. Miguel; Hospital de la Princesa (Madrid), M. Naya and P. Sanz; Hospital Ntra Sra de Alarcos (Ciudad Real), A. Sanchez, L. Caparrós; Hospital Ntra Sra de Sonsoles (Avila), J. C. Chacón and V. Paraíso; Hospital Puerta de Hierro (Madrid), C. Sanz and J. Botella; Hospital Ramón y Cajal (Madrid), R. Marcén and J. L. Teruel; Hospital Severo Ochoa (Leganes), A. Olié and A. Vigil; Hospital Universitario de Getafe (Madrid), R. Sanz; Hospital Virgen de la Luz (Cuenca), F. Tornero, L. Lozano; Hospital Virgen de la Salud (Toledo), R. Díaz; Dialcentro (Madrid), Villaverde and Ayala; Los Enebro (Madrid), I. Vázquez and Ruiz; Los Lauros (Madrid), S. Lamas and J. Naranjo; FIAT Santa Engracia (Madrid), P. Hernando.

*Acknowledgements.* The authors are grateful to Prof W. E. Mitch for his helpful comments concerning the manuscript. This work was supported in part by Hospal S.A. (Spain).

## References

- Mitch WE. Uremia and the control of protein metabolism. *Nephron* 1988; 49: 89–93
- Marcén R. Nutrición en diálisis. *Nefrología* 1990; 10 (suppl 3): 11–17
- Bergström J. Nutrition and adequacy of dialysis in hemodialysis patients. *Kidney Int* 1993; 43 (suppl 41): 261–267
- Lazarus JM. Nutrition in hemodialysis patients. *Am J Kidney Dis* 1993; 21: 99–105
- Hakim RM, Levin N. Malnutrition in hemodialysis patients. *Am J Kidney Dis* 1993; 21: 125–137
- Blumenkrantz MJ, Kopple JD, Gutman RA, Chan YK, Barbour GL, Robers C, Shen FH, Gandhi VC, Tucker T, Curtis FK, Coburn JW. Methods for assessing nutritional status of patients with renal failure. *Am J Clin Nutr* 1980; 33: 1567–1585
- Thunberg BJ, Swamy AP, Cestero RVM. Cross-sectional and longitudinal nutritional measurements in maintenance hemodialysis patients. *Am J Clin Nutr* 1981; 34: 2005–2012
- Marcén R, Martín del Río R, Matesanz R, Teruel JL, Quereda C, Ortuño J. Malnutrición proteica en la uremia. *Nefrología* 1982; 2: 235–239
- Schoenfeld PY, Henry RR, Laird NM, Roxe DM. Assessment of nutritional status of the National Cooperative Dialysis Study population. *Kidney Int* 1983; 23 (suppl 13): 80–88
- Wolfson M, Strong CJ, Minturn D, Gray DK, Kopple JD. Nutritional and lymphocyte function in maintenance hemodialysis patients. *Am J Clin Nutr* 1984; 37: 547–555
- Cano N, Fernandez JP, Lacombe P, Lankester M, Pascal S, Defayolle M, Labastie J, Saingra S. Statistical selection of nutritional parameters in hemodialyzed patients. *Kidney Int* 1987; 32 (suppl 22): 178–180
- Marcé P. Nutritional status of patients on hemodialysis and peritoneal dialysis. *Clin Nephrol* 1988; 29: 75–78
- Bilbrey GL, Cohen TL. Identification and treatment of protein calorie malnutrition in chronic hemodialysis patients. *Dialysis Transplant* 1989; 18: 669–677
- Young GA, Swanepoel CR, Croft MR, Hobson SM, Parsons FM. Anthropometry and plasma valine, amino acids, and proteins in the nutritional assessment of hemodialysis patients. *Kidney Int* 1982; 21: 492–499
- Marcén R, Martín del Río R, Quereda C, Teruel JL, Matesanz R, Orofino L, Ortuño J. Evolución de las concentraciones de proteínas y aminoácidos sanguíneos en hemodiálisis y postrasplante renal. *Nefrología* 1987; 7: 371–376
- Enia G, Sicuso C, Alati G, Zoccali C. Subjective global assessment of nutrition in dialysis patients. *Nephrol Dial Transplant* 1993; 8: 1094–1098
- Anderson CF, Wochos DN. The utility of serum albumin values in the nutritional assessment of hospitalized patients. *Mayo Clin Proc* 1982; 57: 181–184
- Degoulet P, Legrain M, Reach I, Aime F, Devries C, Rojas P, Jacobs C. Mortality risk factors in patients treated by chronic hemodialysis. Report of the Diaphane Collaborative Study. *Nephron* 1982; 31: 103–110
- Acchiardo SR, Moore LW, Latour PA. Malnutrition as the main factor in morbidity and mortality of hemodialysis patients. *Kidney Int* 1983; 24 (suppl 16): 199–203
- Lowrie EG, Lew NL. Death risk in hemodialysis patients: the predictive value of commonly measured variables and an evaluation of death rate differences between facilities. *Am J Kidney Dis* 1990; 15: 458–482
- Lowrie EG, Lew NL. Commonly measured laboratory variables in hemodialysis patients: relationships among them and to death risk. *Sem Nephrol* 1992; 12: 276–283
- Churchill DN, Taylor W, Cook RJ, LaPlante P, Barre P, Cartier P, Fay WP, Goldstein MB, Jindal K, Mandin H, McKenzie JK, Muirhead N, Parfrey PS, Posen GA, Slaughter D, Ulan RA, Werb R. Canadian hemodialysis morbidity study. *Am J Kidney Dis* 1992; 19: 214–234
- Owen WF, Lew NL, Liu Y, Lowrie EG, Lazarus M. The urea reduction ratio and serum albumin concentration as predictors of mortality in patients undergoing hemodialysis. *N Eng J Med* 1993; 329: 1001–1006
- Goldwasser P, Mittman N, Antignani A, Burrell D, Michel M-A, Collier J, Avram MM. Predictors of mortality in hemodialysis patients. *J Am Soc Nephrol* 1993; 3: 1613–1622
- Iseki K, Kawazoe N, Fukiyama K. Serum albumin is a strong predictor of death in chronic dialysis patients. *Kidney Int* 1993; 44: 115–119
- Kaysen GA, Rathore V, Shearer GC, Depner TA. Mechanism of hypoalbuminemia in hemodialysis patients. *Kidney Int* 1995; 48: 510–516
- Bergström J. Nutrition and mortality in hemodialysis. *J Am Soc Nephrol* 1995; 6: 1329–1341
- Grant JP, Custer PB, Thurlow J. Current techniques of nutritional assessment. *Surg Clin North Am* 1981; 61: 437–463
- Haider M, Haider SQ. Assessment of protein-calorie malnutrition. *Clin Chem* 1984; 30: 1286–1299
- Nelson EE, Hong CH, Pesce AL, Peterson DW, Singh S, Pollack VE. Anthropometric norms for the dialysis population. *Am J Kidney Dis* 1990; 16: 32–37
- Alatrue Vidal A, Sitges Serra A, Jaurrieta Más E, Sitges Creus A. Valoración de los parámetros antropométricos en nuestra población. *Med Clin* 1982; 78: 407–415
- Ricart W, Gonzalez-Huix F, Conde V, y Grup per l'Evaluació de la Composició Corporal de la Població de Catalunya. Valoración del estado de nutrición a través de la determinación de los parámetros antropométricos: nuevas tablas de la población laboral de Cataluña. *Med Clin* 1993; 100: 681–691
- Frisancho AR. New norms of upper limb fat and muscle areas for assessment of nutritional status. *Am J Clin Nutr* 1981; 34: 2540–2545
- Gotch FA, Sargent JA. A mechanistic analysis of the National Cooperative Dialysis Study (NCDS). *Kidney Int* 1985; 28: 526–534
- Hakim RM, Depner TA, Parker TF. Adequacy of hemodialysis. *Am J Kidney Dis* 1992; 20: 107–123
- Watson PE, Watson ID, Batt RD. Total body water volumes for adult males and females estimated from simple anthropometric measurements. *Am J Clin Nutr* 1980; 33: 27–39
- Hosmer DW, Lemeshow S. *Applied logistic regression*. New York NY. John Wiley and sons, 1989
- Concato J, Feinstein AR, Holford TR. The risk of determining risk with multivariable models. *Ann Intern Med* 1993; 118: 201–210
- Madore F, Wuest M, Ethier JH. Nutritional evaluation of hemodialysis patients using an impedance index. *Clin Nephrol* 1994; 41: 377–382
- Monteon FJ, Laidlaw SA, Shaib JK, Kopple JD. Energy expenditure in patients with chronic renal failure. *Kidney Int* 1986; 30: 741–747
- Slomowitz LA, Monteon FJ, Grosvenor M, Laidlaw SA, Kopple

- JD. Effect of energy intake on nutritional status in maintenance hemodialysis patients. *Kidney Int* 1989; 35: 704–711
42. Ikizler TA, Hakim RM. Nutrition in end-stage renal disease. *Kidney Int* 1996; 50: 343–357
43. Dwyer J, Kenler SR. Assessment of nutritional status in renal disease. In: Mitch WE and Klahr S ed. *Nutrition and the kidney*. 2nd edition: Boston: Little Brown: 1993: 61–95
44. Blumenkrantz MJ. Nutrition. In: Daugirdas JT and Ing TS ed. *Handbook of dialysis*. 2nd edition: Boston: Little Brown: 1994: 374–400
45. Port FK. Morbidity and mortality in dialysis patients. *Kidney Int* 1994; 46: 1728–1737
46. Hutchinson TA, Thomas DC, MacGibbon B. Predicting survival in adults with end-stage renal disease: an age equivalence index. *Ann Intern Med* 1982; 96: 417–423
47. Hellerstedt WL, Johnson WJ, Ascher N, Kjellstrand CM, Knutson R, Shapiro FL, Sterioff S. Survival rates of 2,728 patients with end-stage renal disease. *Mayo Clin Proc* 1984; 59: 776–783
48. García-García G, Deddens JA, D'Achiardi-Rey R, First MR, Samuels SJ, Kant S, Pollack VE. Results of treatment in patients with end-stage renal disease: a multivariate analysis of risk factors and survival in 341 successive patients *Am J Kidney Dis* 1985; 5: 10–18
49. Mailloux LU, Bellucci AG, Mossey RT, Napolitano B, Moore T, Wilkes BM, Bluestone PA. Predictors of survival in patients undergoing dialysis. *Am J Med* 1988; 84: 855–862
50. Nicolucci A, Cubasso D, Labbrozzi D, Mari E, Jmpicciatore P, Procaccini DA, Forcella M, Stella J, Querques M, Pappani A, Passione A, Strippolis P. Effect of coexistent diseases on survival of patients undergoing dialysis. *ASAIO* 1992; 38: M291–M295
51. McClellan WM, Flanders D, Gutman RA. Variable mortality rates among dialysis treatment centers. *Ann Int Med* 1992; 117: 332–336
52. Comorbid conditions and correlations with mortality risk among 3,399 incident hemodialysis patients. *Am J Kidney Dis* 1992; 20 (Suppl 2): 32–38
53. Hornberger JC, Chernew M, Petersen J, Garber AM. A multivariate analysis of mortality and hospital admissions with high-flux dialysis. *J Am Soc Nephrol* 1992; 3: 1227–1237
54. Khan IH, Catto GD, Edward N, Fleming LW, Henderson IS, MacLeod AM. Influence of coexisting disease on survival on renal-replacement therapy. *Lancet* 1993; 341: 415–418
55. Keane WF, Collins AJ. Influence of co-morbidity on mortality and morbidity in patients treated with hemodialysis. *Am J Kidney Dis* 1994; 24: 1010–1018
56. Iseki K, Nishime, Uehara H, Osawa A, Fukiyama K. Effect of renal diseases and comorbid conditions on survival in chronic dialysis patients. *Nephron* 1994; 68: 80–86
57. Movilli E, Filippini M, Brunori G, Sandrini M, Costantino E, Cristinelli L, Maiorca R. Influence of protein catabolic rate on nutritional status, morbidity and mortality in elderly uraemic patients on chronic haemodialysis: a prospective 3-year follow-up study. *Nephrol Dialysis Transplant* 1995; 10: 514–518
58. Collins AJ, Ma JZ, Umen A, Keshaviah P. Urea index and other predictors of hemodialysis patient survival. *Am J Kidney Dis* 1994; 23: 272–282
59. Pollock CA, Ibels LS, Allen BJ, Ayass W, Caterson RJ, Waugh DA, Macadam C, Pennock Y, Mahony JF. Total body nitrogen as a prognostic marker in maintenance dialysis. *J Am Soc Nephrol* 1995; 6: 82–88
60. Ciancaruso B, Brunori G, Kopple JD, Traverso G, Panarello G, Enia G, Strippoli P, De Vecchi A, Querques M, Viglio G, Vonesh E, Maiorca R. Cross-sectional comparison of malnutrition in continuous ambulatory peritoneal dialysis and hemodialysis patients. *Am J Kidney Dis* 1995; 26: 475–486
61. Maiorca R, Brunori G, Zubani R, et al. Predictive value of dialysis adequacy and nutritional indices for mortality and morbidity in CAPD and HD patients. A longitudinal study. *Nephrol Dial Transplant* 1995; 10: 2295–2305
62. Blagg CR, Liedtke RJ, Batjer JD, Racoosin B, Sawyer TK, Wick MJ, Lawson L, Wilkens K. Serum albumin concentration-related health care financing administration quality assurance criterion is method-dependent: revision is necessary. *Am J Kidney Dis* 1993; 21: 138–144
63. Khan IH, Catto GRD, Edward N, MacLeod AM. Death during the first 90 days of dialysis: a case control study. *Am J Kidney Dis* 1995; 25: 276–280
64. Phillips A, Shaper AG, Whincup PH. Association between serum albumin and mortality from cardiovascular disease, cancer, and other causes. *Lancet* 1989; ii: 1434–1436
65. Soeters PB, von Meyenfeldt MF, Meijerink WJHJ, Fredrix EWHM, Wouters EFM, Schols AMWJ. Serum albumin and mortality. *Lancet* 1990; 335: 348
66. Fleck A, Raines G, Hawker F, Trotter J, Wallace PI, Ledingham I McA, Calman KC. Increased vascular permeability: a major cause of hypoalbuminaemia in disease and injury. *Lancet* 1985; i: 781–783
67. Gosling P, Beevers DG, Goode GE, Hickey NC, Littler WA, Shearman CP, Sheridan JJ, West JNW. Serum albumin and mortality. *Lancet* 1990; 335: 349–350
68. Grimble R. Serum albumin and mortality. *Lancet* 1990; 335: 350
69. Port FK. Mortality and causes of death in patients with end-stage renal failure. *Am J Kidney Dis* 1990; 15: 215–217
70. Carlson DM, Duncan DA, Naessens JM, Johnson WJ. Hospitalization in dialysis patients. *Mayo Clin Proc* 1984; 59: 769–775
71. Habasch G, Bloembergen WE, Port FK, Port FK, Mauger EA, Wolfe RA, Friedrich K. Hospitalization among United States dialysis patients: hemodialysis versus peritoneal dialysis. *J Am Soc Nephrol* 1995; 5: 1940–1948
72. Burton PR, Walls J. A selection adjusted comparison of hospitalization on continuous ambulatory peritoneal dialysis and haemodialysis. *J Clin Epidemiol* 1989; 42: 531–539
73. Maiorca R, Cancarini GC, Brunori G, Camerini C, Manili L. Morbidity and mortality of CAPD and hemodialysis. *Kidney Int* 1993; 43 (suppl. 40): 4–15

Received for publication: 9.1.97

Accepted in revised form: 11.7.97
